# Supplementary material for: Systems biology analysis reveals new insights into invasive lung cancer
Source: BMC Syst Biol. 2018 Dec 14;12(Suppl 7):117. doi: 10.1186/s12918-018-0637-z (PMC6293490; doi:10.1186/s12918-018-0637-z)
Supplement: Supplementary file 4 — Table S2. GO terms of the up- and down-regulated genes. (XLSX 41 kb) [file 12918_2018_637_MOESM4_ESM.xlsx]

## Sheet: Sheet1
Down-regulated genes
Category	Term	Count	%	P-Value	Benjamini
GOTERM_BP_DIRECT	response to toxic substance	4	9.8	0.00093	0.21
GOTERM_BP_DIRECT	transport	4	9.8	0.044	1
GOTERM_BP_DIRECT	protein localization to cell surface	2	4.9	0.049	0.99
GOTERM_BP_DIRECT	inflammatory response	4	9.8	0.054	0.97
GOTERM_BP_DIRECT	protein homooligomerization	3	7.3	0.061	0.96
GOTERM_BP_DIRECT	response to cocaine	2	4.9	0.07	0.95
GOTERM_BP_DIRECT	regulation of heart rate by cardiac conduction	2	4.9	0.076	0.94
GOTERM_BP_DIRECT	bicarbonate transport	2	4.9	0.095	0.96
Up-regulated genes
GOTERM_BP_DIRECT	antigen processing and presentation	2	14.3	0.029	0.88
GOTERM_BP_DIRECT	negative regulation of cell growth	2	14.3	0.063	0.91
